# Supplementary material
Source: publisher figshare collection journal article supplement (https://geolsoc.figshare.com/ndownloader/files/34986373)
Supplement: Supplementary file 1 [file 34986373]

Depth [m]	Substrate diffusion coefficient[m^2/s]	Substrate omega [m/s]	Temperature [C]	Fractionation factor [permil]	Reaction term [mM/s]	Reaction term with limiter	SRR_fmol/cm3/day
0	4.46E-10	2.50E-13	1.77	1.07647	1.45E-12	1.45E-12	125.69
1	4.38E-10	2.54E-13	1.8272	1.07647	1.43E-12	1.43E-12	123.95
2	4.30E-10	2.57E-13	1.8844	1.07647	1.41E-12	1.41E-12	122.22
3	4.22E-10	2.60E-13	1.9416	1.07646	1.39E-12	1.39E-12	120.48
4	4.15E-10	2.64E-13	1.9988	1.07646	1.37E-12	1.37E-12	118.75
5	4.09E-10	2.66E-13	2.056	1.07646	1.35E-12	1.35E-12	117.02
6	4.05E-10	2.68E-13	2.1132	1.07645	1.33E-12	1.33E-12	115.28
7	4.02E-10	2.70E-13	2.1704	1.07645	1.31E-12	1.31E-12	113.55
8	3.99E-10	2.72E-13	2.2276	1.07645	1.29E-12	1.29E-12	111.81
9	3.97E-10	2.73E-13	2.2848	1.07645	1.27E-12	1.27E-12	110.08
10	3.95E-10	2.75E-13	2.342	1.07644	1.25E-12	1.25E-12	108.35
11	3.94E-10	2.76E-13	2.3992	1.07644	1.23E-12	1.23E-12	106.61
12	3.93E-10	2.77E-13	2.4564	1.07644	1.21E-12	1.21E-12	104.88
13	3.92E-10	2.78E-13	2.5136	1.07644	1.19E-12	1.19E-12	103.14
14	3.91E-10	2.79E-13	2.5708	1.07643	1.17E-12	1.17E-12	101.41
15	3.90E-10	2.80E-13	2.628	1.07643	1.15E-12	1.15E-12	99.68
16	3.89E-10	2.81E-13	2.6852	1.07643	1.13E-12	1.13E-12	97.94
17	3.89E-10	2.81E-13	2.7424	1.07642	1.11E-12	1.11E-12	96.21
18	3.88E-10	2.82E-13	2.7996	1.07642	1.09E-12	1.09E-12	94.47
19	3.88E-10	2.83E-13	2.8568	1.07642	1.07E-12	1.07E-12	92.74
20	3.87E-10	2.83E-13	2.914	1.07642	1.05E-12	1.05E-12	91.01
21	3.87E-10	2.84E-13	2.9712	1.07641	1.03E-12	1.03E-12	89.27
22	3.87E-10	2.85E-13	3.0284	1.07641	1.01E-12	1.01E-12	87.54
23	3.87E-10	2.85E-13	3.0856	1.07641	9.93E-13	9.93E-13	85.80
24	3.87E-10	2.86E-13	3.1428	1.07641	9.73E-13	9.73E-13	84.07
25	3.87E-10	2.86E-13	3.2	1.0764	9.53E-13	9.53E-13	82.34
26	3.87E-10	2.87E-13	3.2572	1.0764	9.33E-13	9.33E-13	80.60
27	3.87E-10	2.87E-13	3.3144	1.0764	9.13E-13	9.13E-13	78.87
28	3.87E-10	2.88E-13	3.3716	1.0764	8.93E-13	8.93E-13	77.13
29	3.87E-10	2.88E-13	3.4288	1.0764	8.73E-13	8.73E-13	75.40
30	3.87E-10	2.89E-13	3.486	1.07639	8.53E-13	8.53E-13	73.67
31	3.87E-10	2.89E-13	3.5432	1.07639	8.33E-13	8.33E-13	71.93
32	3.87E-10	2.89E-13	3.6004	1.07639	8.12E-13	8.12E-13	70.20
33	3.87E-10	2.90E-13	3.6576	1.07639	7.92E-13	7.92E-13	68.46
34	3.88E-10	2.90E-13	3.7148	1.07638	7.72E-13	7.72E-13	66.73
35	3.88E-10	2.91E-13	3.772	1.07638	7.52E-13	7.52E-13	65.00
36	3.88E-10	2.91E-13	3.8292	1.07638	7.32E-13	7.32E-13	63.26
37	3.88E-10	2.91E-13	3.8864	1.07638	7.12E-13	7.12E-13	61.53
38	3.89E-10	2.92E-13	3.9436	1.07638	6.92E-13	6.92E-13	59.79
39	3.89E-10	2.92E-13	4.0008	1.07637	6.72E-13	6.72E-13	58.06
40	3.89E-10	2.92E-13	4.058	1.07637	6.52E-13	6.52E-13	56.33
41	3.89E-10	2.93E-13	4.1152	1.07637	6.42E-13	6.42E-13	55.45
42	3.90E-10	2.93E-13	4.1724	1.07637	6.32E-13	6.32E-13	54.57
43	3.90E-10	2.93E-13	4.2296	1.07637	6.21E-13	6.21E-13	53.69
44	3.90E-10	2.94E-13	4.2868	1.07636	6.11E-13	6.11E-13	52.81
45	3.91E-10	2.94E-13	4.344	1.07636	6.01E-13	6.01E-13	51.93
46	3.91E-10	2.94E-13	4.4012	1.07636	5.91E-13	5.91E-13	51.05
47	3.92E-10	2.94E-13	4.4584	1.07636	5.81E-13	5.81E-13	50.17
48	3.92E-10	2.95E-13	4.5156	1.07636	5.71E-13	5.71E-13	49.30
49	3.92E-10	2.95E-13	4.5728	1.07636	5.60E-13	5.60E-13	48.42
50	3.93E-10	2.95E-13	4.63	1.07635	5.50E-13	5.50E-13	47.54
51	3.93E-10	2.96E-13	4.6872	1.07635	5.40E-13	5.40E-13	46.66
52	3.94E-10	2.96E-13	4.7444	1.07635	5.30E-13	5.30E-13	45.78
53	3.94E-10	2.96E-13	4.8016	1.07635	5.20E-13	5.20E-13	44.90
54	3.94E-10	2.96E-13	4.8588	1.07635	5.10E-13	5.10E-13	44.02
55	3.95E-10	2.97E-13	4.916	1.07635	4.99E-13	4.99E-13	43.15
56	3.95E-10	2.97E-13	4.9732	1.07634	4.89E-13	4.89E-13	42.27
57	3.96E-10	2.97E-13	5.0304	1.07634	4.79E-13	4.79E-13	41.39
58	3.96E-10	2.97E-13	5.0876	1.07634	4.69E-13	4.69E-13	40.51
59	3.97E-10	2.97E-13	5.1448	1.07634	4.59E-13	4.59E-13	39.63
60	3.97E-10	2.98E-13	5.202	1.07634	4.49E-13	4.49E-13	38.75
61	3.98E-10	2.98E-13	5.2592	1.07634	4.38E-13	4.38E-13	37.87
62	3.98E-10	2.98E-13	5.3164	1.07634	4.28E-13	4.28E-13	37.00
63	3.99E-10	2.98E-13	5.3736	1.07633	4.18E-13	4.18E-13	36.12
64	3.99E-10	2.99E-13	5.4308	1.07633	4.08E-13	4.08E-13	35.24
65	4.00E-10	2.99E-13	5.488	1.07633	3.98E-13	3.98E-13	34.36
66	4.00E-10	2.99E-13	5.5452	1.07633	3.88E-13	3.88E-13	33.48
67	4.01E-10	2.99E-13	5.6024	1.07633	3.77E-13	3.77E-13	32.60
68	4.01E-10	2.99E-13	5.6596	1.07633	3.67E-13	3.67E-13	31.72
69	4.02E-10	3.00E-13	5.7168	1.07633	3.57E-13	3.57E-13	30.85
70	4.02E-10	3.00E-13	5.774	1.07633	3.47E-13	3.47E-13	29.97
71	4.03E-10	3.00E-13	5.8312	1.07633	3.37E-13	3.37E-13	29.09
72	4.03E-10	3.00E-13	5.8884	1.07632	3.26E-13	3.26E-13	28.21
73	4.04E-10	3.00E-13	5.9456	1.07632	3.16E-13	3.16E-13	27.33
74	4.04E-10	3.01E-13	6.0028	1.07632	3.06E-13	3.06E-13	26.45
75	4.05E-10	3.01E-13	6.06	1.07632	2.96E-13	2.96E-13	25.57
76	4.05E-10	3.01E-13	6.1172	1.07632	2.86E-13	2.86E-13	24.69
77	4.06E-10	3.01E-13	6.1744	1.07632	2.76E-13	2.76E-13	23.82
78	4.06E-10	3.01E-13	6.2316	1.07632	2.65E-13	2.65E-13	22.94
79	4.07E-10	3.01E-13	6.2888	1.07632	2.55E-13	2.55E-13	22.06
80	4.08E-10	3.02E-13	6.346	1.07632	2.45E-13	2.45E-13	21.18
81	4.08E-10	3.02E-13	6.4032	1.07632	2.35E-13	2.35E-13	20.30
82	4.09E-10	3.02E-13	6.4604	1.07631	2.25E-13	2.25E-13	19.42
83	4.09E-10	3.02E-13	6.5176	1.07631	2.15E-13	2.15E-13	18.54
84	4.10E-10	3.02E-13	6.5748	1.07631	2.04E-13	2.04E-13	17.67
85	4.10E-10	3.02E-13	6.632	1.07631	1.94E-13	1.94E-13	16.79
86	4.11E-10	3.03E-13	6.6892	1.07631	1.84E-13	1.84E-13	15.91
87	4.12E-10	3.03E-13	6.7464	1.07631	1.74E-13	1.74E-13	15.03
88	4.12E-10	3.03E-13	6.8036	1.07631	1.64E-13	1.64E-13	14.15
89	4.13E-10	3.03E-13	6.8608	1.07631	1.54E-13	1.54E-13	13.27
90	4.13E-10	3.03E-13	6.918	1.07631	1.43E-13	1.43E-13	12.39
91	4.14E-10	3.03E-13	6.9752	1.07631	1.33E-13	1.33E-13	11.52
92	4.14E-10	3.03E-13	7.0324	1.07631	1.23E-13	1.23E-13	10.64
93	4.15E-10	3.04E-13	7.0896	1.0763	1.13E-13	1.13E-13	9.76
94	4.16E-10	3.04E-13	7.1468	1.0763	1.03E-13	1.03E-13	8.88
95	4.16E-10	3.04E-13	7.204	1.0763	9.26E-14	9.26E-14	8.00
96	4.17E-10	3.04E-13	7.2612	1.0763	8.24E-14	8.24E-14	7.12
97	4.17E-10	3.04E-13	7.3184	1.0763	7.23E-14	7.23E-14	6.24
98	4.18E-10	3.04E-13	7.3756	1.0763	6.21E-14	6.21E-14	5.37
99	4.19E-10	3.04E-13	7.4328	1.0763	5.19E-14	5.19E-14	4.49
100	4.19E-10	3.05E-13	7.49	1.0763	4.18E-14	4.18E-14	3.61
101	4.20E-10	3.05E-13	7.5472	1.0763	4.24E-14	4.24E-14	3.66
102	4.20E-10	3.05E-13	7.6044	1.0763	4.30E-14	4.30E-14	3.72
103	4.21E-10	3.05E-13	7.6616	1.0763	4.37E-14	4.37E-14	3.77
104	4.22E-10	3.05E-13	7.7188	1.0763	4.43E-14	4.43E-14	3.83
105	4.22E-10	3.05E-13	7.776	1.0763	4.49E-14	4.49E-14	3.88
106	4.23E-10	3.05E-13	7.8332	1.07629	4.56E-14	4.56E-14	3.94
107	4.23E-10	3.06E-13	7.8904	1.07629	4.62E-14	4.62E-14	3.99
108	4.24E-10	3.06E-13	7.9476	1.07629	4.68E-14	4.68E-14	4.05
109	4.25E-10	3.06E-13	8.0048	1.05895	4.75E-14	4.75E-14	4.10
110	4.25E-10	3.06E-13	8.062	1.04161	4.81E-14	4.81E-14	4.16
111	4.26E-10	3.06E-13	8.1192	1.04161	4.87E-14	4.87E-14	4.21
112	4.27E-10	3.06E-13	8.1764	1.04161	4.94E-14	4.94E-14	4.27
113	4.27E-10	3.06E-13	8.2336	1.04161	5.00E-14	5.00E-14	4.32
114	4.28E-10	3.06E-13	8.2908	1.04161	5.06E-14	5.06E-14	4.38
115	4.28E-10	3.07E-13	8.348	1.04161	5.13E-14	5.13E-14	4.43
116	4.29E-10	3.07E-13	8.4052	1.04161	5.19E-14	5.19E-14	4.48
117	4.30E-10	3.07E-13	8.4624	1.04161	5.25E-14	5.25E-14	4.54
118	4.30E-10	3.07E-13	8.5196	1.04161	5.32E-14	5.32E-14	4.59
119	4.31E-10	3.07E-13	8.5768	1.04161	5.38E-14	5.38E-14	4.65
120	4.32E-10	3.07E-13	8.634	1.04161	5.44E-14	5.44E-14	4.70
121	4.32E-10	3.07E-13	8.6912	1.04161	5.51E-14	5.51E-14	4.76
122	4.33E-10	3.07E-13	8.7484	1.04161	5.57E-14	5.57E-14	4.81
123	4.33E-10	3.07E-13	8.8056	1.04161	5.63E-14	5.63E-14	4.87
124	4.34E-10	3.08E-13	8.8628	1.04161	5.70E-14	5.70E-14	4.92
125	4.35E-10	3.08E-13	8.92	1.04161	5.76E-14	5.76E-14	4.98
126	4.35E-10	3.08E-13	8.9772	1.04161	5.82E-14	5.82E-14	5.03
127	4.36E-10	3.08E-13	9.0344	1.04161	5.89E-14	5.89E-14	5.09
128	4.37E-10	3.08E-13	9.0916	1.04161	5.95E-14	5.95E-14	5.14
129	4.37E-10	3.08E-13	9.1488	1.04161	6.01E-14	6.01E-14	5.20
130	4.38E-10	3.08E-13	9.206	1.04161	6.08E-14	6.08E-14	5.25
131	4.38E-10	3.08E-13	9.2632	1.04161	6.14E-14	6.14E-14	5.31
132	4.39E-10	3.08E-13	9.3204	1.0416	6.21E-14	6.21E-14	5.36
133	4.40E-10	3.09E-13	9.3776	1.0416	6.27E-14	6.27E-14	5.42
134	4.40E-10	3.09E-13	9.4348	1.0416	6.33E-14	6.33E-14	5.47
135	4.41E-10	3.09E-13	9.492	1.0416	6.40E-14	6.40E-14	5.53
136	4.42E-10	3.09E-13	9.5492	1.0416	6.46E-14	6.46E-14	5.58
137	4.42E-10	3.09E-13	9.6064	1.0416	6.52E-14	6.52E-14	5.64
138	4.43E-10	3.09E-13	9.6636	1.0416	6.59E-14	6.59E-14	5.69
139	4.44E-10	3.09E-13	9.7208	1.0416	6.65E-14	6.65E-14	5.74
140	4.44E-10	3.09E-13	9.778	1.0416	6.71E-14	6.71E-14	5.80
141	4.45E-10	3.09E-13	9.8352	1.0416	6.78E-14	6.78E-14	5.85
142	4.46E-10	3.09E-13	9.8924	1.0416	6.84E-14	6.84E-14	5.91
143	4.46E-10	3.10E-13	9.9496	1.0416	6.90E-14	6.90E-14	5.96
144	4.47E-10	3.10E-13	10.0068	1.0416	6.97E-14	6.97E-14	6.02
145	4.48E-10	3.10E-13	10.064	1.0416	7.03E-14	7.03E-14	6.07
146	4.48E-10	3.10E-13	10.1212	1.0416	7.09E-14	7.09E-14	6.13
147	4.49E-10	3.10E-13	10.1784	1.0416	7.16E-14	7.16E-14	6.18
148	4.50E-10	3.10E-13	10.2356	1.0416	7.22E-14	7.22E-14	6.24
149	4.50E-10	3.10E-13	10.2928	1.0416	7.28E-14	7.28E-14	6.29
150	4.51E-10	3.10E-13	10.35	1.0416	7.35E-14	7.35E-14	6.35
151	4.51E-10	3.10E-13	10.4072	1.0416	7.41E-14	7.41E-14	6.40
152	4.52E-10	3.10E-13	10.4644	1.0416	7.47E-14	7.47E-14	6.46
153	4.53E-10	3.10E-13	10.5216	1.0416	7.54E-14	7.54E-14	6.51
154	4.53E-10	3.11E-13	10.5788	1.0416	7.60E-14	7.60E-14	6.57
155	4.54E-10	3.11E-13	10.636	1.0416	7.66E-14	7.66E-14	6.62
156	4.55E-10	3.11E-13	10.6932	1.0416	7.73E-14	7.73E-14	6.68
157	4.55E-10	3.11E-13	10.7504	1.0416	7.79E-14	7.79E-14	6.73
158	4.56E-10	3.11E-13	10.8076	1.0416	7.85E-14	7.85E-14	6.79
159	4.57E-10	3.11E-13	10.8648	1.0416	7.92E-14	7.92E-14	6.84
160	4.57E-10	3.11E-13	10.922	1.0416	7.98E-14	7.98E-14	6.90
161	4.58E-10	3.11E-13	10.9792	1.0416	8.04E-14	8.04E-14	6.95
162	4.59E-10	3.11E-13	11.0364	1.04159	8.11E-14	8.11E-14	7.01
163	4.59E-10	3.11E-13	11.0936	1.04159	8.17E-14	8.17E-14	7.06
164	4.60E-10	3.11E-13	11.1508	1.04159	8.23E-14	8.23E-14	7.11
165	4.61E-10	3.12E-13	11.208	1.04159	8.30E-14	8.30E-14	7.17
166	4.61E-10	3.12E-13	11.2652	1.04159	8.36E-14	8.36E-14	7.22
167	4.62E-10	3.12E-13	11.3224	1.04159	8.42E-14	8.42E-14	7.28
168	4.63E-10	3.12E-13	11.3796	1.04159	8.49E-14	8.49E-14	7.33
169	4.63E-10	3.12E-13	11.4368	1.04159	8.55E-14	8.55E-14	7.39
170	4.64E-10	3.12E-13	11.494	1.04159	8.62E-14	8.62E-14	7.44
171	4.65E-10	3.12E-13	11.5512	1.04159	8.68E-14	8.68E-14	7.50
172	4.65E-10	3.12E-13	11.6084	1.04159	8.74E-14	8.74E-14	7.55
173	4.66E-10	3.12E-13	11.6656	1.04159	8.81E-14	8.81E-14	7.61
174	4.67E-10	3.12E-13	11.7228	1.04159	8.87E-14	8.87E-14	7.66
175	4.67E-10	3.12E-13	11.78	1.04159	8.93E-14	8.93E-14	7.72
176	4.68E-10	3.12E-13	11.8372	1.04159	9.00E-14	9.00E-14	7.77
177	4.69E-10	3.13E-13	11.8944	1.04159	9.06E-14	9.06E-14	7.83
178	4.69E-10	3.13E-13	11.9516	1.04159	9.12E-14	9.12E-14	7.88
179	4.70E-10	3.13E-13	12.0088	1.04159	9.19E-14	9.19E-14	7.94
180	4.71E-10	3.13E-13	12.066	1.04159	9.25E-14	9.25E-14	7.99
181	4.71E-10	3.13E-13	12.1232	1.04159	9.31E-14	9.31E-14	8.05
182	4.72E-10	3.13E-13	12.1804	1.04159	9.38E-14	9.38E-14	8.10
183	4.73E-10	3.13E-13	12.2376	1.04159	9.44E-14	9.44E-14	8.16
184	4.73E-10	3.13E-13	12.2948	1.04159	9.50E-14	9.50E-14	8.21
185	4.74E-10	3.13E-13	12.352	1.04159	9.57E-14	9.57E-14	8.27
186	4.75E-10	3.13E-13	12.4092	1.04159	9.63E-14	9.63E-14	8.32
187	4.75E-10	3.13E-13	12.4664	1.04159	9.69E-14	9.69E-14	8.38
188	4.76E-10	3.13E-13	12.5236	1.04159	9.76E-14	9.76E-14	8.43
189	4.77E-10	3.13E-13	12.5808	1.04159	9.82E-14	9.82E-14	8.48
190	4.77E-10	3.14E-13	12.638	1.04159	9.88E-14	9.88E-14	8.54
191	4.78E-10	3.14E-13	12.6952	1.04159	9.95E-14	9.95E-14	8.59
192	4.79E-10	3.14E-13	12.7524	1.04159	1.00E-13	1.00E-13	8.65
193	4.79E-10	3.14E-13	12.8096	1.04159	1.01E-13	1.01E-13	8.70
194	4.80E-10	3.14E-13	12.8668	1.04159	1.01E-13	1.01E-13	8.76
195	4.81E-10	3.14E-13	12.924	1.04159	1.02E-13	1.02E-13	8.81
196	4.81E-10	3.14E-13	12.9812	1.04159	1.03E-13	1.03E-13	8.87
197	4.82E-10	3.14E-13	13.0384	1.04159	1.03E-13	1.03E-13	8.92
198	4.83E-10	3.14E-13	13.0956	1.04159	1.04E-13	1.04E-13	8.98
199	4.83E-10	3.14E-13	13.1528	1.04159	1.05E-13	1.05E-13	9.03
200	4.84E-10	3.14E-13	13.21	1.04159	1.05E-13	1.05E-13	9.09
201	4.85E-10	3.14E-13	13.2672	1.04159	1.06E-13	1.06E-13	9.14
202	4.86E-10	3.14E-13	13.3244	1.04159	1.06E-13	1.06E-13	9.20
203	4.86E-10	3.14E-13	13.3816	1.04159	1.07E-13	1.07E-13	9.25
204	4.87E-10	3.15E-13	13.4388	1.04159	1.08E-13	1.08E-13	9.31
205	4.88E-10	3.15E-13	13.496	1.04159	1.08E-13	1.08E-13	9.36
206	4.88E-10	3.15E-13	13.5532	1.04159	1.09E-13	1.09E-13	9.42
207	4.89E-10	3.15E-13	13.6104	1.04159	1.10E-13	1.10E-13	9.47
208	4.90E-10	3.15E-13	13.6676	1.04159	1.10E-13	1.10E-13	9.53
209	4.90E-10	3.15E-13	13.7248	1.04158	1.11E-13	1.11E-13	9.58
210	4.91E-10	3.15E-13	13.782	1.04158	1.12E-13	1.12E-13	9.64
211	4.92E-10	3.15E-13	13.8392	1.04158	1.12E-13	1.12E-13	9.67
212	4.92E-10	3.15E-13	13.8964	1.04158	1.12E-13	1.12E-13	9.71
213	4.93E-10	3.15E-13	13.9536	1.04158	1.13E-13	1.13E-13	9.74
214	4.94E-10	3.15E-13	14.0108	1.04158	1.13E-13	1.13E-13	9.78
215	4.94E-10	3.15E-13	14.068	1.04158	1.14E-13	1.14E-13	9.82
216	4.95E-10	3.15E-13	14.1252	1.04158	1.14E-13	1.14E-13	9.85
217	4.96E-10	3.15E-13	14.1824	1.04158	1.14E-13	1.14E-13	9.89
218	4.96E-10	3.15E-13	14.2396	1.04158	1.15E-13	1.15E-13	9.93
219	4.97E-10	3.16E-13	14.2968	1.04158	1.15E-13	1.15E-13	9.96
220	4.98E-10	3.16E-13	14.354	1.04158	1.16E-13	1.16E-13	10.00
221	4.98E-10	3.16E-13	14.4112	1.04158	1.16E-13	1.16E-13	10.03
222	4.99E-10	3.16E-13	14.4684	1.04158	1.17E-13	1.17E-13	10.07
223	5.00E-10	3.16E-13	14.5256	1.04158	1.17E-13	1.17E-13	10.11
224	5.00E-10	3.16E-13	14.5828	1.04158	1.17E-13	1.17E-13	10.14
225	5.01E-10	3.16E-13	14.64	1.04158	1.18E-13	1.18E-13	10.18
226	5.02E-10	3.16E-13	14.6972	1.04158	1.18E-13	1.18E-13	10.22
227	5.03E-10	3.16E-13	14.7544	1.04158	1.19E-13	1.19E-13	10.25
228	5.03E-10	3.16E-13	14.8116	1.04158	1.19E-13	1.19E-13	10.29
229	5.04E-10	3.16E-13	14.8688	1.04158	1.19E-13	1.19E-13	10.32
230	5.05E-10	3.16E-13	14.926	1.04158	1.20E-13	1.20E-13	10.36
231	5.05E-10	3.16E-13	14.9832	1.04158	1.20E-13	1.20E-13	10.40
232	5.06E-10	3.16E-13	15.0404	1.04158	1.21E-13	1.21E-13	10.43
233	5.07E-10	3.16E-13	15.0976	1.04158	1.21E-13	1.21E-13	10.47
234	5.07E-10	3.16E-13	15.1548	1.04158	1.22E-13	1.22E-13	10.51
235	5.08E-10	3.17E-13	15.212	1.04158	1.22E-13	1.22E-13	10.54
236	5.09E-10	3.17E-13	15.2692	1.04158	1.22E-13	1.22E-13	10.58
237	5.09E-10	3.17E-13	15.3264	1.04158	1.23E-13	1.23E-13	10.61
238	5.10E-10	3.17E-13	15.3836	1.04158	1.23E-13	1.23E-13	10.65
239	5.11E-10	3.17E-13	15.4408	1.04158	1.24E-13	1.24E-13	10.69
240	5.11E-10	3.17E-13	15.498	1.04158	1.24E-13	1.24E-13	10.72
241	5.12E-10	3.17E-13	15.5552	1.04158	1.25E-13	1.25E-13	10.76
242	5.13E-10	3.17E-13	15.6124	1.04158	1.25E-13	1.25E-13	10.80
243	5.13E-10	3.17E-13	15.6696	1.04158	1.25E-13	1.25E-13	10.83
244	5.14E-10	3.17E-13	15.7268	1.04158	1.26E-13	1.26E-13	10.87
245	5.15E-10	3.17E-13	15.784	1.04158	1.26E-13	1.26E-13	10.90
246	5.16E-10	3.17E-13	15.8412	1.04158	1.27E-13	1.27E-13	10.94
247	5.16E-10	3.17E-13	15.8984	1.04158	1.27E-13	1.27E-13	10.98
248	5.17E-10	3.17E-13	15.9556	1.04158	1.27E-13	1.27E-13	11.01
249	5.18E-10	3.17E-13	16.0128	1.04158	1.28E-13	1.28E-13	11.05
250	5.18E-10	3.17E-13	16.07	1.04158	1.28E-13	1.28E-13	11.09
251	5.19E-10	3.18E-13	16.1272	1.04158	1.29E-13	1.29E-13	11.12
252	5.20E-10	3.18E-13	16.1844	1.04158	1.29E-13	1.29E-13	11.16
253	5.20E-10	3.18E-13	16.2416	1.04158	1.30E-13	1.30E-13	11.19
254	5.21E-10	3.18E-13	16.2988	1.04158	1.30E-13	1.30E-13	11.23
255	5.22E-10	3.18E-13	16.356	1.04159	1.30E-13	1.30E-13	11.27
256	5.22E-10	3.18E-13	16.4132	1.04159	1.31E-13	1.31E-13	11.30
257	5.23E-10	3.18E-13	16.4704	1.04159	1.31E-13	1.31E-13	11.34
258	5.24E-10	3.18E-13	16.5276	1.04159	1.32E-13	1.32E-13	11.38
259	5.24E-10	3.18E-13	16.5848	1.04159	1.32E-13	1.32E-13	11.41
260	5.25E-10	3.18E-13	16.642	1.04159	1.32E-13	1.32E-13	11.45
261	5.26E-10	3.18E-13	16.6992	1.04159	1.33E-13	1.33E-13	11.48
262	5.26E-10	3.18E-13	16.7564	1.04159	1.33E-13	1.33E-13	11.52
263	5.27E-10	3.18E-13	16.8136	1.04159	1.34E-13	1.34E-13	11.56
264	5.28E-10	3.18E-13	16.8708	1.04159	1.34E-13	1.34E-13	11.59
265	5.29E-10	3.18E-13	16.928	1.04159	1.35E-13	1.35E-13	11.63
266	5.29E-10	3.18E-13	16.9852	1.04159	1.35E-13	1.35E-13	11.67
267	5.30E-10	3.18E-13	17.0424	1.04159	1.35E-13	1.35E-13	11.70
268	5.31E-10	3.18E-13	17.0996	1.04159	1.36E-13	1.36E-13	11.74
269	5.31E-10	3.18E-13	17.1568	1.04159	1.36E-13	1.36E-13	11.77
270	5.32E-10	3.19E-13	17.214	1.04159	1.37E-13	1.37E-13	11.81
271	5.33E-10	3.19E-13	17.2712	1.04159	1.37E-13	1.37E-13	11.85
272	5.33E-10	3.19E-13	17.3284	1.04159	1.38E-13	1.38E-13	11.88
273	5.34E-10	3.19E-13	17.3856	1.04159	1.38E-13	1.38E-13	11.92
274	5.35E-10	3.19E-13	17.4428	1.04159	1.38E-13	1.38E-13	11.96
275	5.35E-10	3.19E-13	17.5	1.04159	1.39E-13	1.39E-13	11.99
276	5.36E-10	3.19E-13	17.5572	1.04159	1.39E-13	1.39E-13	12.03
277	5.37E-10	3.19E-13	17.6144	1.04159	1.40E-13	1.40E-13	12.06
278	5.37E-10	3.19E-13	17.6716	1.04159	1.40E-13	1.40E-13	12.10
279	5.38E-10	3.19E-13	17.7288	1.04159	1.40E-13	1.40E-13	12.14
280	5.39E-10	3.19E-13	17.786	1.04159	1.41E-13	1.41E-13	12.17
281	5.40E-10	3.19E-13	17.8432	1.04159	1.41E-13	1.41E-13	12.21
282	5.40E-10	3.19E-13	17.9004	1.04159	1.42E-13	1.42E-13	12.25
283	5.41E-10	3.19E-13	17.9576	1.04159	1.42E-13	1.42E-13	12.28
284	5.42E-10	3.19E-13	18.0148	1.04159	1.43E-13	1.43E-13	12.32
285	5.42E-10	3.19E-13	18.072	1.04159	1.43E-13	1.43E-13	12.35
286	5.43E-10	3.19E-13	18.1292	1.04159	1.43E-13	1.43E-13	12.39
287	5.44E-10	3.19E-13	18.1864	1.04159	1.44E-13	1.44E-13	12.43
288	5.44E-10	3.19E-13	18.2436	1.04159	1.44E-13	1.44E-13	12.46
289	5.45E-10	3.20E-13	18.3008	1.04159	1.45E-13	1.45E-13	12.50
290	5.46E-10	3.20E-13	18.358	1.04159	1.45E-13	1.45E-13	12.54
291	5.46E-10	3.20E-13	18.4152	1.04159	1.46E-13	1.46E-13	12.57
292	5.47E-10	3.20E-13	18.4724	1.04159	1.46E-13	1.46E-13	12.61
293	5.48E-10	3.20E-13	18.5296	1.04159	1.46E-13	1.46E-13	12.64
294	5.49E-10	3.20E-13	18.5868	1.04159	1.47E-13	1.47E-13	12.68
295	5.49E-10	3.20E-13	18.644	1.04159	1.47E-13	1.47E-13	12.72
296	5.50E-10	3.20E-13	18.7012	1.04159	1.48E-13	1.48E-13	12.75
297	5.51E-10	3.20E-13	18.7584	1.04159	1.48E-13	1.48E-13	12.79
298	5.51E-10	3.20E-13	18.8156	1.04159	1.48E-13	1.48E-13	12.83
299	5.52E-10	3.20E-13	18.8728	1.04159	1.49E-13	1.49E-13	12.86
300	5.53E-10	3.20E-13	18.93	1.0416	1.49E-13	1.49E-13	12.90
301	5.53E-10	3.20E-13	18.9872	1.0416	1.50E-13	1.50E-13	12.93
302	5.54E-10	3.20E-13	19.0444	1.0416	1.50E-13	1.50E-13	12.97
303	5.55E-10	3.20E-13	19.1016	1.0416	1.51E-13	1.51E-13	13.01
304	5.55E-10	3.20E-13	19.1588	1.0416	1.51E-13	1.51E-13	13.04
305	5.56E-10	3.20E-13	19.216	1.0416	1.51E-13	1.51E-13	13.08
306	5.57E-10	3.20E-13	19.2732	1.0416	1.52E-13	1.52E-13	13.12
307	5.58E-10	3.20E-13	19.3304	1.0416	1.52E-13	1.52E-13	13.15
308	5.58E-10	3.20E-13	19.3876	1.0416	1.53E-13	1.53E-13	13.19
309	5.59E-10	3.20E-13	19.4448	1.0416	1.53E-13	1.53E-13	13.22
310	5.60E-10	3.21E-13	19.502	1.0416	1.53E-13	1.53E-13	13.26
311	5.60E-10	3.21E-13	19.5592	1.0416	1.54E-13	1.54E-13	13.30
312	5.61E-10	3.21E-13	19.6164	1.0416	1.54E-13	1.54E-13	13.33
313	5.62E-10	3.21E-13	19.6736	1.0416	1.55E-13	1.55E-13	13.37
314	5.62E-10	3.21E-13	19.7308	1.0416	1.55E-13	1.55E-13	13.41
315	5.63E-10	3.21E-13	19.788	1.0416	1.56E-13	1.56E-13	13.44
316	5.64E-10	3.21E-13	19.8452	1.0416	1.56E-13	1.56E-13	13.48
317	5.64E-10	3.21E-13	19.9024	1.0416	1.56E-13	1.56E-13	13.51
318	5.65E-10	3.21E-13	19.9596	1.0416	1.57E-13	1.57E-13	13.55
319	5.66E-10	3.21E-13	20.0168	1.0416	1.57E-13	1.57E-13	13.59
320	5.67E-10	3.21E-13	20.074	1.0416	1.58E-13	1.58E-13	13.62
321	5.67E-10	3.21E-13	20.1312	1.0416	1.58E-13	1.58E-13	13.66
322	5.68E-10	3.21E-13	20.1884	1.0416	1.59E-13	1.59E-13	13.70
323	5.69E-10	3.21E-13	20.2456	1.0416	1.59E-13	1.59E-13	13.73
324	5.69E-10	3.21E-13	20.3028	1.0416	1.59E-13	1.59E-13	13.77
325	5.70E-10	3.21E-13	20.36	1.0416	1.60E-13	1.60E-13	13.80
326	5.71E-10	3.21E-13	20.4172	1.04161	1.60E-13	1.60E-13	13.84
327	5.71E-10	3.21E-13	20.4744	1.04161	1.61E-13	1.61E-13	13.88
328	5.72E-10	3.21E-13	20.5316	1.04161	1.61E-13	1.61E-13	13.91
329	5.73E-10	3.21E-13	20.5888	1.04161	1.61E-13	1.61E-13	13.95
330	5.74E-10	3.21E-13	20.646	1.04161	1.62E-13	1.62E-13	13.99
331	5.74E-10	3.21E-13	20.7032	1.04161	1.62E-13	1.62E-13	14.02
332	5.75E-10	3.22E-13	20.7604	1.04161	1.63E-13	1.63E-13	14.06
333	5.76E-10	3.22E-13	20.8176	1.04161	1.63E-13	1.63E-13	14.09
334	5.76E-10	3.22E-13	20.8748	1.04161	1.64E-13	1.64E-13	14.13
335	5.77E-10	3.22E-13	20.932	1.04161	1.64E-13	1.64E-13	14.17
336	5.78E-10	3.22E-13	20.9892	1.04161	1.64E-13	1.64E-13	14.20
337	5.78E-10	3.22E-13	21.0464	1.04161	1.65E-13	1.65E-13	14.24
338	5.79E-10	3.22E-13	21.1036	1.04161	1.65E-13	1.65E-13	14.28
339	5.80E-10	3.22E-13	21.1608	1.04161	1.66E-13	1.66E-13	14.31
340	5.80E-10	3.22E-13	21.218	1.04161	1.66E-13	1.66E-13	14.35
341	5.81E-10	3.22E-13	21.2752	1.04161	1.66E-13	1.66E-13	14.38
342	5.82E-10	3.22E-13	21.3324	1.04161	1.67E-13	1.67E-13	14.42
343	5.83E-10	3.22E-13	21.3896	1.04161	1.67E-13	1.67E-13	14.46
344	5.83E-10	3.22E-13	21.4468	1.04161	1.68E-13	1.68E-13	14.49
345	5.84E-10	3.22E-13	21.504	1.04161	1.68E-13	1.68E-13	14.53
346	5.85E-10	3.22E-13	21.5612	1.04161	1.69E-13	1.69E-13	14.57
347	5.85E-10	3.22E-13	21.6184	1.04162	1.69E-13	1.69E-13	14.60
348	5.86E-10	3.22E-13	21.6756	1.04162	1.69E-13	1.69E-13	14.64
349	5.87E-10	3.22E-13	21.7328	1.04162	1.70E-13	1.70E-13	14.67
350	5.87E-10	3.22E-13	21.79	1.04162	1.70E-13	1.70E-13	14.71
351	5.88E-10	3.22E-13	21.8472	1.04162	1.68E-13	1.68E-13	14.50
352	5.89E-10	3.22E-13	21.9044	1.04162	1.65E-13	1.65E-13	14.28
353	5.90E-10	3.22E-13	21.9616	1.04162	1.63E-13	1.63E-13	14.07
354	5.90E-10	3.22E-13	22.0188	1.04162	1.60E-13	1.60E-13	13.85
355	5.91E-10	3.22E-13	22.076	1.04162	1.58E-13	1.58E-13	13.64
356	5.92E-10	3.23E-13	22.1332	1.04162	1.55E-13	1.55E-13	13.42
357	5.92E-10	3.23E-13	22.1904	1.04162	1.53E-13	1.53E-13	13.21
358	5.93E-10	3.23E-13	22.2476	1.04162	1.50E-13	1.50E-13	12.99
359	5.94E-10	3.23E-13	22.3048	1.04162	1.48E-13	1.48E-13	12.77
360	5.94E-10	3.23E-13	22.362	1.04162	1.45E-13	1.45E-13	12.56
361	5.95E-10	3.23E-13	22.4192	1.04162	1.43E-13	1.43E-13	12.34
362	5.96E-10	3.23E-13	22.4764	1.04162	1.40E-13	1.40E-13	12.13
363	5.96E-10	3.23E-13	22.5336	1.04162	1.38E-13	1.38E-13	11.91
364	5.97E-10	3.23E-13	22.5908	1.04162	1.35E-13	1.35E-13	11.70
365	5.98E-10	3.23E-13	22.648	1.04163	1.33E-13	1.33E-13	11.48
366	5.99E-10	3.23E-13	22.7052	1.04163	1.30E-13	1.30E-13	11.27
367	5.99E-10	3.23E-13	22.7624	1.04163	1.28E-13	1.28E-13	11.05
368	6.00E-10	3.23E-13	22.8196	1.04163	1.25E-13	1.25E-13	10.84
369	6.01E-10	3.23E-13	22.8768	1.04163	1.23E-13	1.23E-13	10.62
370	6.01E-10	3.23E-13	22.934	1.04163	1.20E-13	1.20E-13	10.41
371	6.02E-10	3.23E-13	22.9912	1.04163	1.18E-13	1.18E-13	10.19
372	6.03E-10	3.23E-13	23.0484	1.04163	1.15E-13	1.15E-13	9.98
373	6.03E-10	3.23E-13	23.1056	1.04163	1.13E-13	1.13E-13	9.76
374	6.04E-10	3.23E-13	23.1628	1.04163	1.11E-13	1.11E-13	9.55
375	6.05E-10	3.23E-13	23.22	1.04163	1.08E-13	1.08E-13	9.33
376	6.06E-10	3.23E-13	23.2772	1.04163	1.06E-13	1.06E-13	9.12
377	6.06E-10	3.23E-13	23.3344	1.04163	1.03E-13	1.03E-13	8.90
378	6.07E-10	3.23E-13	23.3916	1.04163	1.01E-13	1.01E-13	8.69
379	6.08E-10	3.23E-13	23.4488	1.04163	9.81E-14	9.81E-14	8.47
380	6.08E-10	3.23E-13	23.506	1.04163	9.56E-14	9.56E-14	8.26
381	6.09E-10	3.24E-13	23.5632	1.04163	9.31E-14	9.31E-14	8.04
382	6.10E-10	3.24E-13	23.6204	1.04164	9.06E-14	9.06E-14	7.83
383	6.10E-10	3.24E-13	23.6776	1.04164	8.81E-14	8.81E-14	7.61
384	6.11E-10	3.24E-13	23.7348	1.04164	8.56E-14	8.56E-14	7.40
385	6.12E-10	3.24E-13	23.792	1.04164	8.31E-14	8.31E-14	7.18
386	6.12E-10	3.24E-13	23.8492	1.04164	8.07E-14	8.07E-14	6.97
387	6.13E-10	3.24E-13	23.9064	1.04164	7.82E-14	7.82E-14	6.75
388	6.14E-10	3.24E-13	23.9636	1.04164	7.57E-14	7.57E-14	6.54
389	6.15E-10	3.24E-13	24.0208	1.04164	7.32E-14	7.32E-14	6.32
390	6.15E-10	3.24E-13	24.078	1.04164	7.07E-14	7.07E-14	6.11
391	6.16E-10	3.24E-13	24.1352	1.04164	6.82E-14	6.82E-14	5.89
392	6.17E-10	3.24E-13	24.1924	1.04164	6.57E-14	6.57E-14	5.68
393	6.17E-10	3.24E-13	24.2496	1.04164	6.32E-14	6.32E-14	5.46
394	6.18E-10	3.24E-13	24.3068	1.04164	6.07E-14	6.07E-14	5.25
395	6.19E-10	3.24E-13	24.364	1.04164	5.82E-14	5.82E-14	5.03
396	6.19E-10	3.24E-13	24.4212	1.04164	5.58E-14	5.58E-14	4.82
397	6.20E-10	3.24E-13	24.4784	1.04164	5.33E-14	5.33E-14	4.60
398	6.21E-10	3.24E-13	24.5356	1.04164	5.08E-14	5.08E-14	4.39
399	6.22E-10	3.24E-13	24.5928	1.04165	4.83E-14	4.83E-14	4.17
400	6.22E-10	3.24E-13	24.65	1.04165	4.58E-14	4.58E-14	3.96
401	6.23E-10	3.24E-13	24.7072	1.04165	4.33E-14	4.33E-14	3.74
402	6.24E-10	3.24E-13	24.7644	1.04165	4.08E-14	4.08E-14	3.53
403	6.24E-10	3.24E-13	24.8216	1.04165	3.83E-14	3.83E-14	3.31
404	6.25E-10	3.24E-13	24.8788	1.04165	3.58E-14	3.58E-14	3.10
405	6.26E-10	3.24E-13	24.936	1.04165	3.34E-14	3.34E-14	2.88
406	6.26E-10	3.24E-13	24.9932	1.04165	3.09E-14	3.09E-14	2.67
407	6.27E-10	3.25E-13	25.0504	1.04165	2.84E-14	2.84E-14	2.45
408	6.28E-10	3.25E-13	25.1076	1.04165	2.59E-14	2.59E-14	2.24
409	6.29E-10	3.25E-13	25.1648	1.04165	2.34E-14	2.34E-14	2.02
410	6.29E-10	3.25E-13	25.222	1.04165	2.09E-14	2.09E-14	1.81
411	6.30E-10	3.25E-13	25.2792	1.04165	1.84E-14	1.84E-14	1.59
412	6.31E-10	3.25E-13	25.3364	1.04165	1.59E-14	1.59E-14	1.38
413	6.31E-10	3.25E-13	25.3936	1.04165	1.34E-14	1.34E-14	1.16
414	6.32E-10	3.25E-13	25.4508	1.04165	1.10E-14	1.10E-14	0.95
415	6.33E-10	3.25E-13	25.508	1.04165	8.47E-15	8.47E-15	0.73
416	6.33E-10	3.25E-13	25.5652	1.04165	5.98E-15	5.98E-15	0.52
417	6.34E-10	3.25E-13	25.6224	1.04166	3.49E-15	3.49E-15	0.30
418	6.35E-10	3.25E-13	25.6796	1.04166	1.00E-15	1.00E-15	0.09
